# Supplementary material for: On-demand release of a selective MMP-13 blocker from an enzyme-responsive injectable hydrogel protects cartilage from degenerative progression in osteoarthritis
Source: Royal Society of Chemistry journal article supplement (doi:10.1039/d3tb02871b), 2024-01-01
Supplement: d3tb02871b1.pdf [file d3tb02871b1.pdf]

## **Supporting Information**

### **On-demand Release of a Selective MMP-13 Blocker from an Enzyme-Responsive Injectable Hydrogel Protects Cartilage from Degenerative Progression in Osteoarthritis**

Himadri Shekhar Roy<sup>#</sup>, Preethi Murugesan<sup>#</sup>, Chirag Kulkarni<sup>§</sup>, Malika Arora<sup>#</sup>, Geet Kumar Nagar<sup>§</sup>, Rajdeep Guha<sup>§§</sup>, Naibedya Chattopadhyay<sup>§</sup>, Deepa Ghosh<sup>#\*</sup>

---

<sup>#</sup> Chemical Biology Unit, Institute of Nano Science and Technology, Knowledge City, Sector-81, Mohali-140306, Punjab, India.

<sup>§</sup> Division of Endocrinology and Centre for Research in ASTHI, CSIR-Central Drug Research Institute, Lucknow- 226031, Uttar Pradesh, India.

<sup>§§</sup> Division of Laboratory Animal Facility, CSIR-Central Drug Research Institute, Lucknow- 226031, Uttar Pradesh, India.

#### **\*Corresponding Author:**

Email: Prof. Deepa Ghosh (deepa.ghosh@inst.ac.in).

1. Cytocompatibility studies of BI-4394

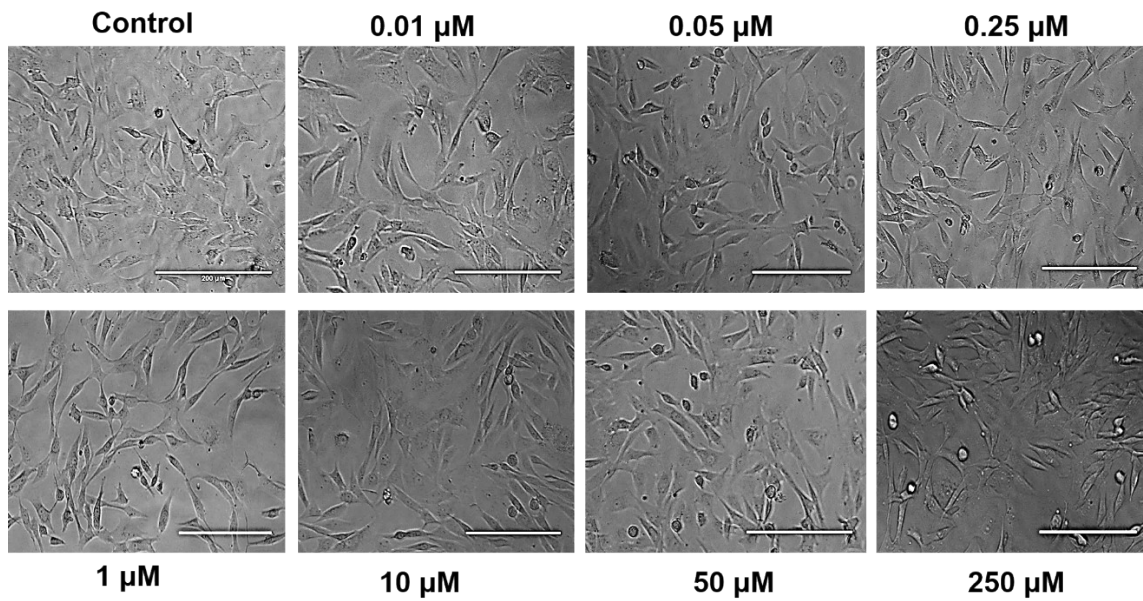

**Fig S1:** Representative images of human articular chondrocytes treated with BI-4394. Scale bar represents 200  $\mu$ m.

2. Gene regulation with BI-4394

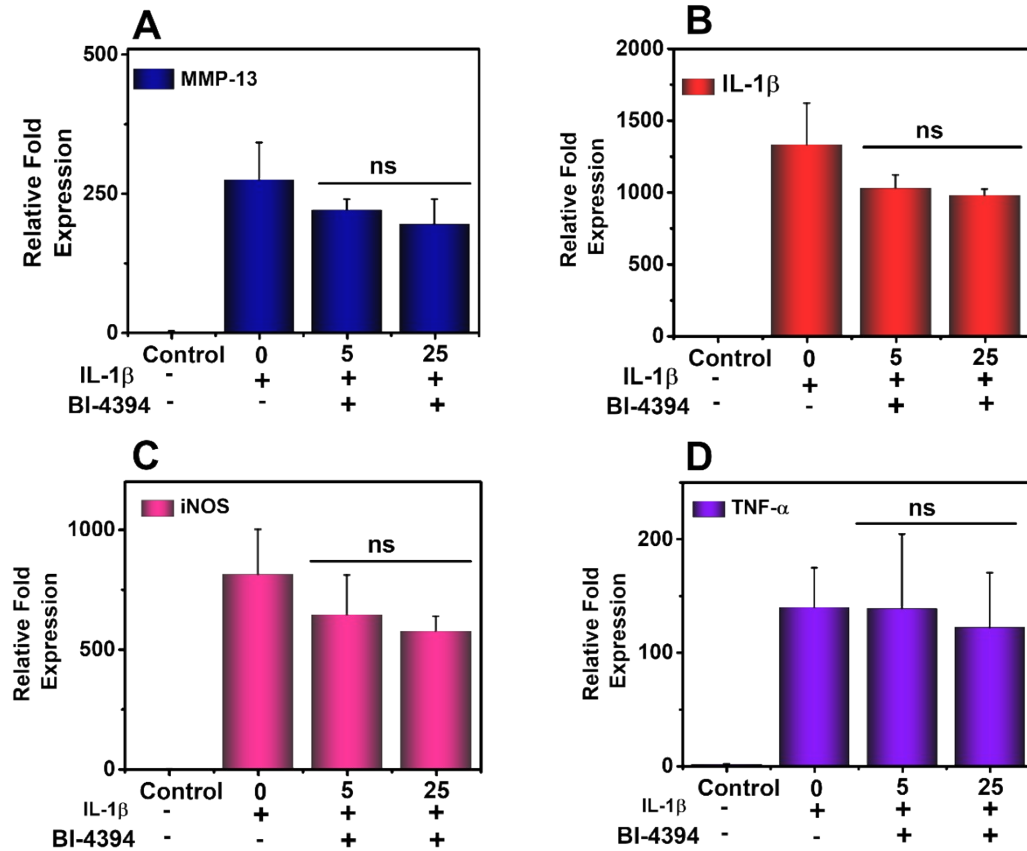

**Fig S2:** Gene expression in chondrocytes treated with IL-1 $\beta$  and BI-4394 respectively. (A) MMP-13; (B) IL-1 $\beta$ ; (C) iNOS; (D) TNF- $\alpha$ . “ns” denotes no significant difference in expression in comparison to IL-1 $\beta$  treated group.

### 3. Characterization of BI-4394 loaded hydrogels

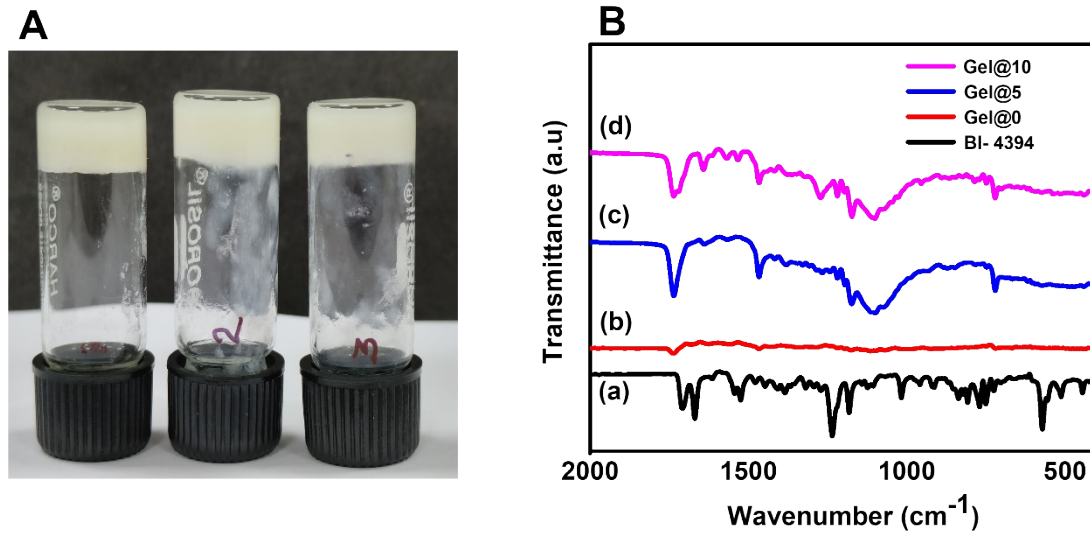

**Fig S3:** Characterization of BI-4394 loaded hydrogel. (A) Representative images of hydrogels. Blank hydrogel (left); (2) 5 mg/mL loaded BI-4394 (middle); (3) 10 mg/mL loaded BI-4394 (right); (B) FTIR.

#### 4. Cytocompatibility studies of hydrogel

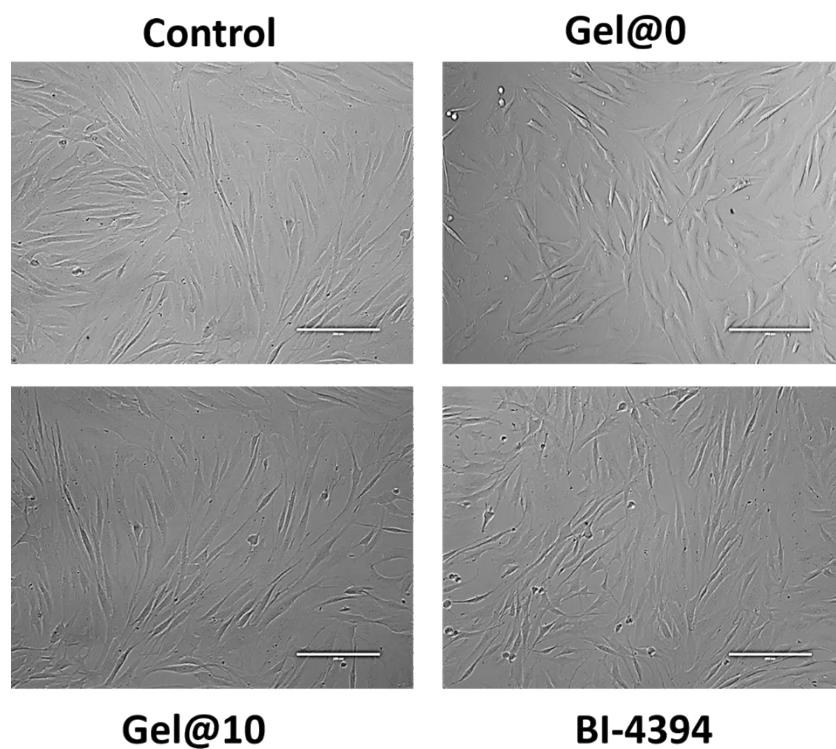

**Fig S4:** Representative images of human articular chondrocytes treated with BI-4394 loaded hydrogels. Scale bar represents 200  $\mu\text{m}$ .

#### 5. Rheology of the hydrogels

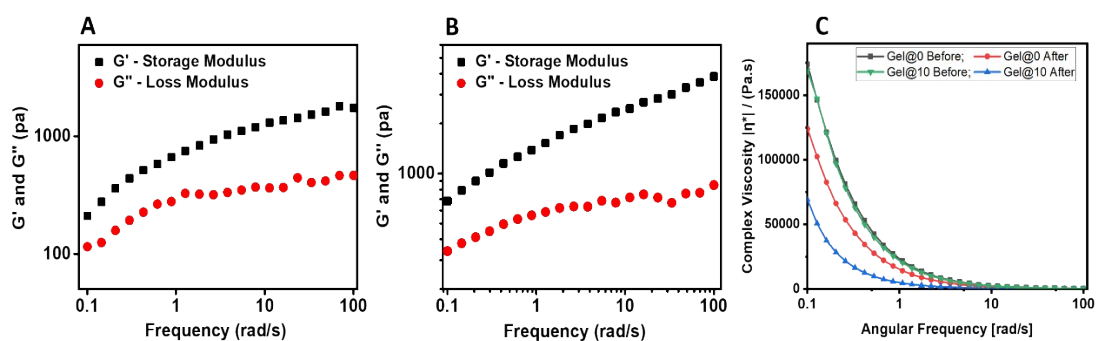

**Fig S5:** Frequency sweep (A) Blank hydrogel (Gel@0); (B) BI-4394 loaded hydrogel (Gel@10); (C) Gel viscosity of the Gel@0 and Gel@10 before and after injection with a shear rate ranging from 0.1 to 100 rad/s at 25  $^{\circ}\text{C}$ .

6 *In-vivo safety evaluation of hydrogels*

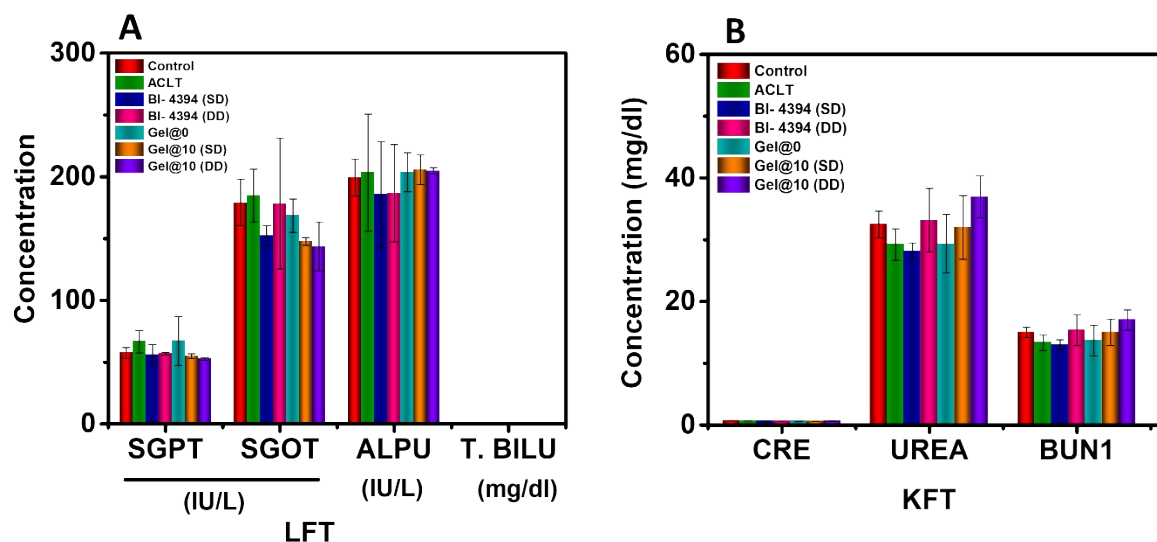

**Fig S6:** Estimation of markers for (A) Liver function test (LFT); (B) Kidney function test (KFT).

**Table 1:** Table for OARSI scoring guidelines.

| OARSI Guidelines   Osteoarthritis Research Society International. |                                                                     |       |
|-------------------------------------------------------------------|---------------------------------------------------------------------|-------|
| A                                                                 | Structure                                                           | Score |
| 1                                                                 | Normal score.                                                       | 0     |
| 2                                                                 | Slight surface irregularities.                                      | 1     |
| 3                                                                 | Moderate surface irregularities.                                    | 2     |
| 4                                                                 | Severe surface irregularities.                                      | 3     |
| 5                                                                 | Clefts/fissures into transitional zone (one-third depth).           | 4     |
| 6                                                                 | Clefts/fissures into radial zone (two-thirds depth).                | 5     |
| 7                                                                 | Clefts/fissures into calcified zone (full depth).                   | 6     |
| 8                                                                 | Fibrillation and/or erosion to transitional zone (one-third depth). | 7     |
| 9                                                                 | Fibrillation and/or erosion to radial zone (two-thirds depth).      | 8     |
| 10                                                                | Fibrillation and/or erosion to calcified zone (full depth).         | 9     |
| 11                                                                | Fibrillation and/or erosion to subchondral bone.                    | 10    |
| B                                                                 | Cellularity                                                         |       |

|          |                              |   |
|----------|------------------------------|---|
| 1        | Normal score.                | 0 |
| 2        | Increase or slight decrease. | 1 |
| 3        | Moderate decrease.           | 2 |
| 4        | Severe decrease.             | 3 |
| 5        | No cells present.            | 4 |
| <b>C</b> | <b>Chondrocytes Cloning</b>  |   |
| 1        | Normal score.                | 0 |
| 2        | Several doublets.            | 1 |
| 3        | Many doublets.               | 2 |
| 4        | Doublets and triplets.       | 3 |
| 5        | Multiple cell nests.         | 4 |

### 7 *In-vivo* OARSI Scoring

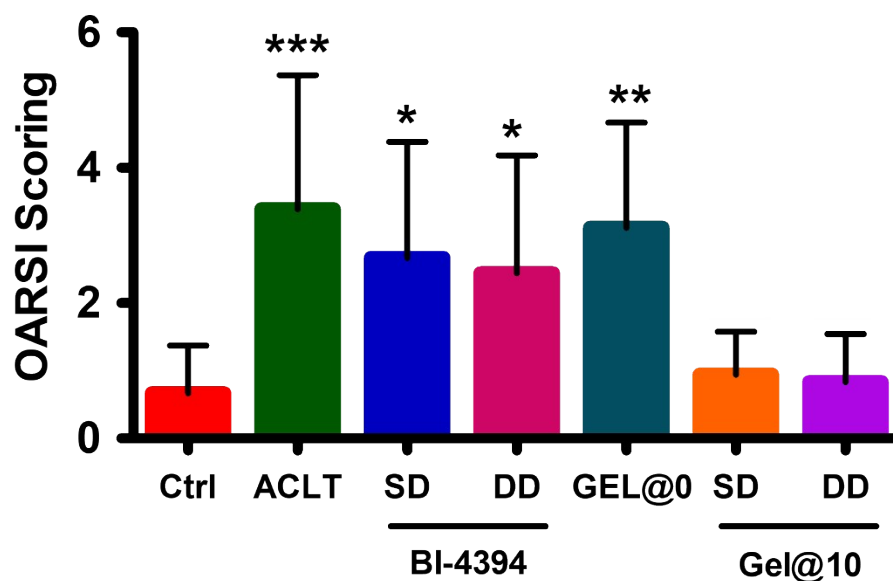

**Fig S7:** OARSI scoring of microscopic evaluation of histological sections. One-way ANOVA, Dunnett's multiple comparisons test. \* represents the level of significance in comparison to control group. (\*\* $P \leq 0.0001$ , \*\* $P \leq 0.01$  and \* $P \leq 0.05$ ).

8 *In-vivo* evaluation of MMP-13

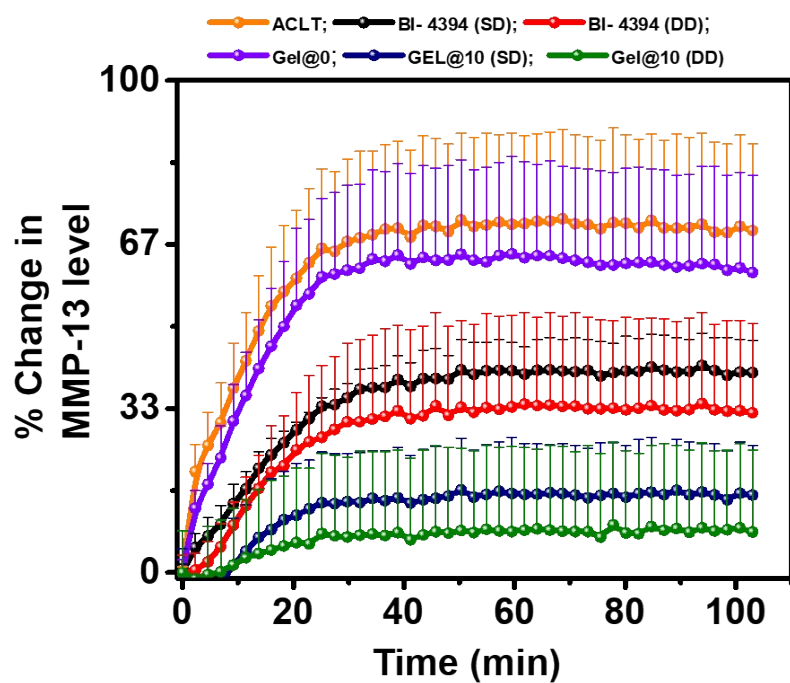

Fig S8. MMP-13 levels in the respective rat serum.
